# Supplementary material for: Single phase, electrically insulating, multiferroic La-substituted BiFeO3prepared by mechanosynthesis
Source: Royal Society of Chemistry journal article supplement (doi:10.1039/c4tc01426j), 2014-01-01
Supplement: c4tc01426j1.pdf [file c4tc01426j1.pdf]

## Supplementary information

### High quality samples of La-substituted BiFeO<sub>3</sub> prepared by mechanosynthesis

Antonio Perejón<sup>a,b</sup>, Pedro E. Sánchez-Jiménez<sup>a</sup>, José M. Criado<sup>a</sup>, Luis A. Pérez-Maqueda<sup>a</sup>, Julio Romero de Paz<sup>c</sup>, Regino Sáez-Puche<sup>d</sup>, Nahum Masó<sup>e</sup>, Anthony R. West<sup>f</sup>

<sup>a</sup>*Instituto de Ciencia de Materiales de Sevilla (CSIC-Universidad de Sevilla). C. Américo Vespucio 49, Sevilla 41092. Spain*

<sup>b</sup>*Department of Chemistry, Inorganic Chemistry Laboratory, University of Oxford, South Parks Road, Oxford, OX1 3QR, United Kingdom*

<sup>c</sup>*Universidad Complutense de Madrid, CAI Técnicas Físicas, Ciudad Universitaria s/n, Madrid, Spain*

<sup>d</sup>*Departamento Química Inorgánica, Facultad de Ciencias Químicas, Universidad Complutense de Madrid, Ciudad Universitaria, 28040 Madrid, Spain*

<sup>e</sup>*Centre for Material Science and Nanotechnology (SMN) Forskningsparken Gaustadallèen 21 0349 Oslo. Norway*

<sup>f</sup>*Department of Materials Science and Engineering, University of Sheffield, S1 3JD Sheffield, UK*

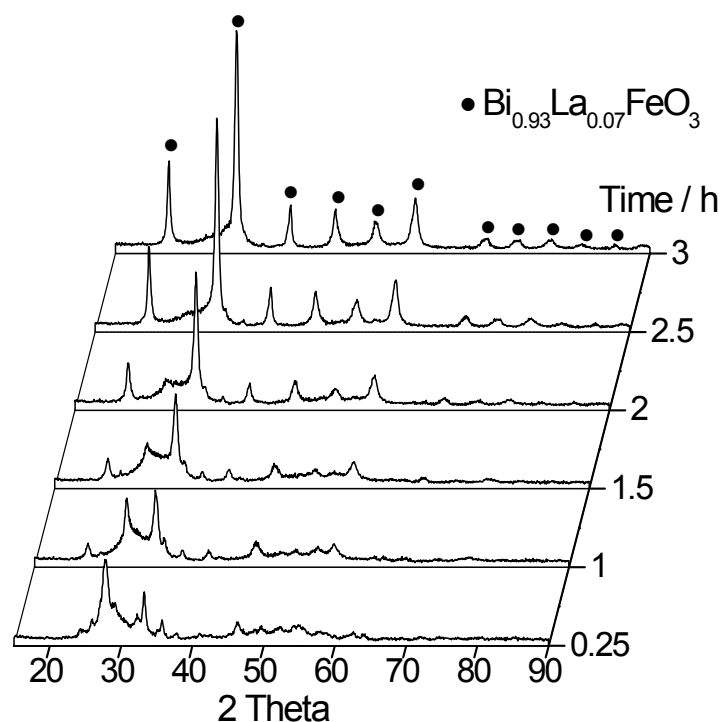

**Figure S1.** Diffraction patterns at different milling times of the solids obtained after milling under oxygen (7 bar) the stoichiometric amounts of the single oxides necessary for the composition  $\text{Bi}_{0.93}\text{La}_{0.07}\text{FeO}_3$ .

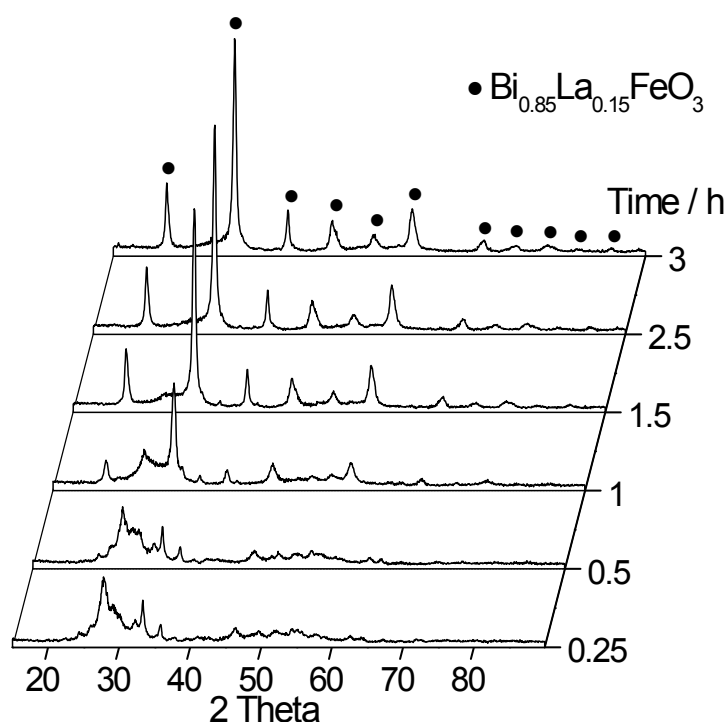

**Figure S2.** Diffraction patterns at different milling times of the solids obtained after milling under oxygen (7 bar) the stoichiometric amounts of the single oxides necessary for the composition  $\text{Bi}_{0.85}\text{La}_{0.15}\text{FeO}_3$ .

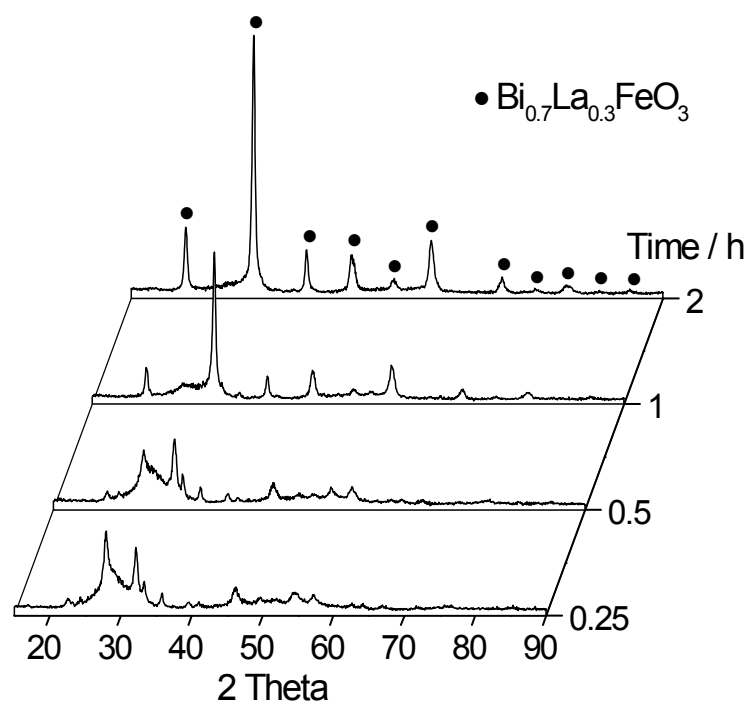

**Figure S3.** Diffraction patterns at different milling times of the solids obtained after milling under oxygen (7 bar) the stoichiometric amounts of the single oxides necessary for the composition  $\text{Bi}_{0.70}\text{La}_{0.30}\text{FeO}_3$ .

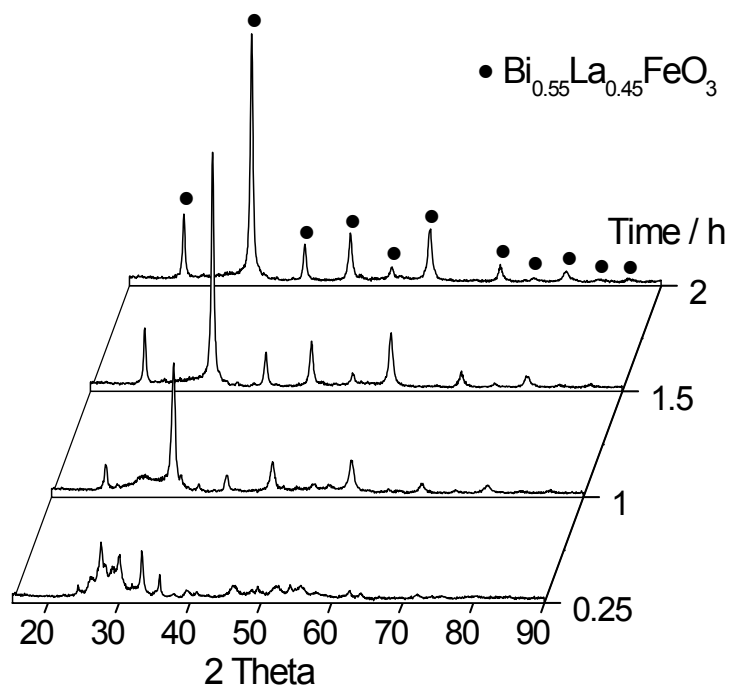

**Figure S4.** Diffraction patterns at different milling times of the solids obtained after milling under oxygen (7 bar) the stoichiometric amounts of the single oxides necessary for the composition  $\text{Bi}_{0.55}\text{La}_{0.45}\text{FeO}_3$ .

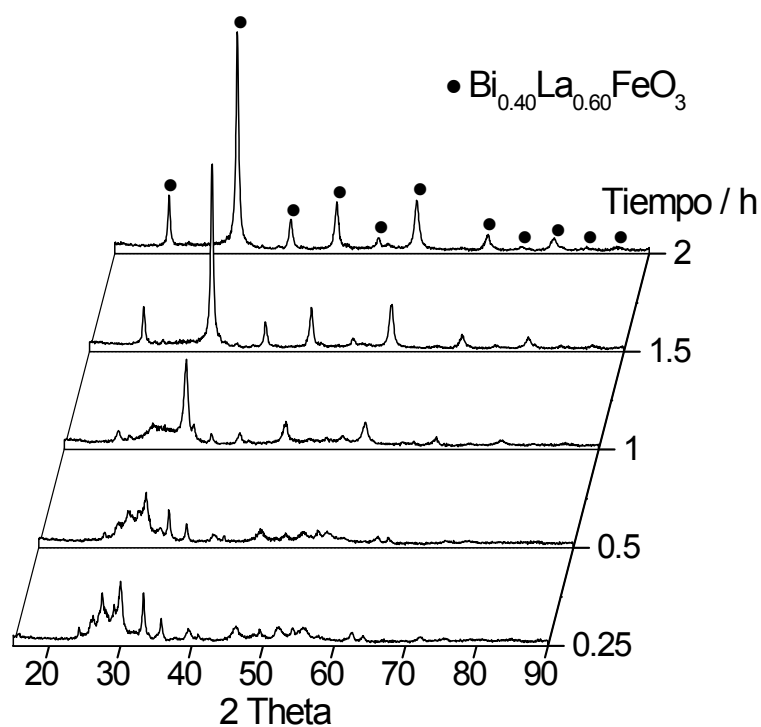

**Figure S5.** Diffraction patterns at different milling times of the solids obtained after milling under oxygen (7 bar) the stoichiometric amounts of the single oxides necessary for the composition  $\text{Bi}_{0.40}\text{La}_{0.60}\text{FeO}_3$ .

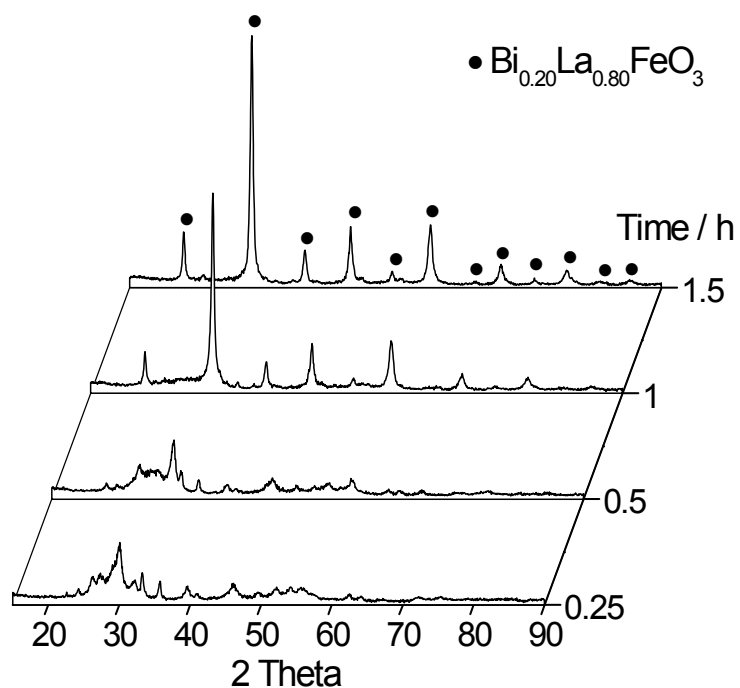

**Figure S6.** Diffraction patterns at different milling times of the solids obtained after milling under oxygen (7 bar) the stoichiometric amounts of the single oxides necessary for the composition  $\text{Bi}_{0.20}\text{La}_{0.80}\text{FeO}_3$ .

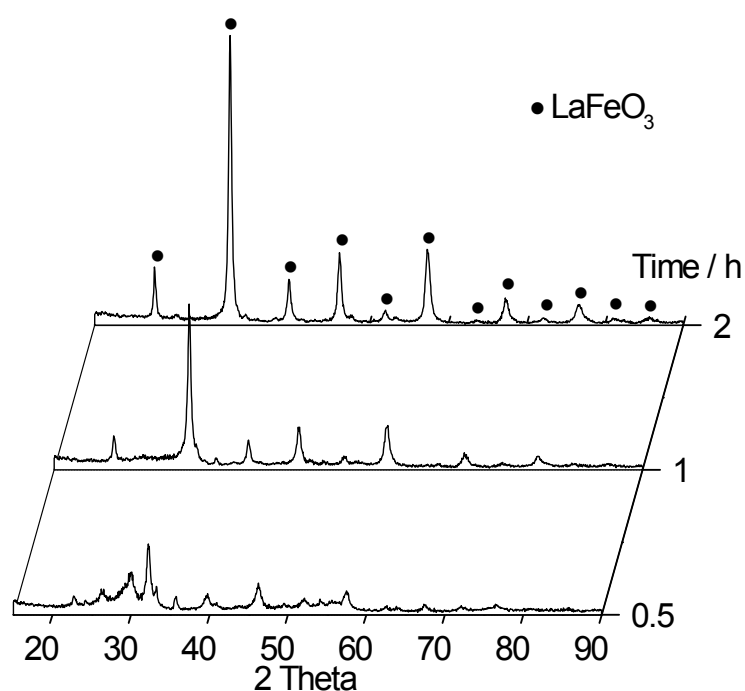

**Figure S7.** Diffraction patterns at different milling times of the solids obtained after milling under oxygen (7 bar) the stoichiometric amounts of the single oxides necessary for the composition  $\text{LaFeO}_3$ .

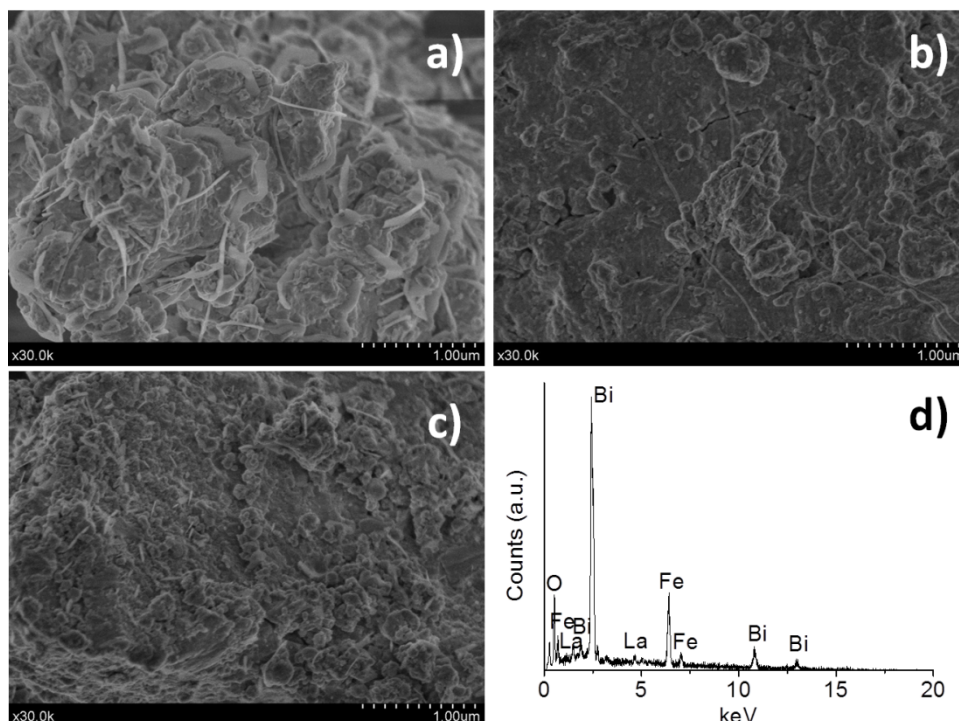

**Figure S8.** SEM micrographs corresponding to powders obtained after milling the single oxides necessary for the composition  $\text{Bi}_{0.93}\text{La}_{0.07}\text{FeO}_3$ . Micrographs were taken after milling (a) 0.5 h, (b) 1 h, (c) 3 h, (d) EDX spectrum of the product shown in (c).

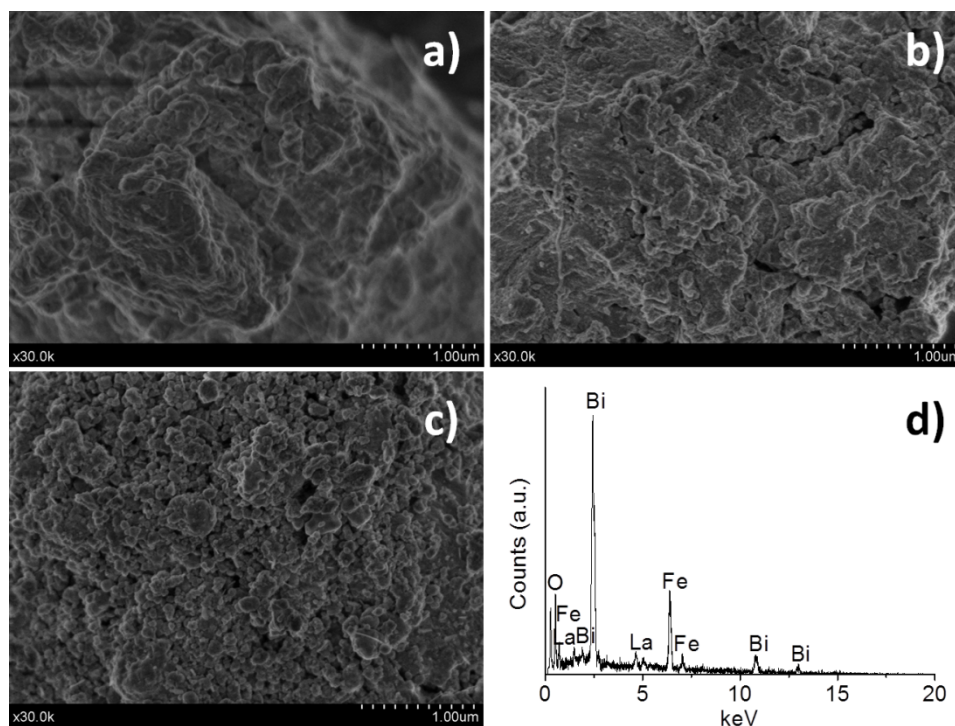

**Figure S9.** SEM micrographs corresponding to powders obtained after milling the single oxides necessary for the composition  $\text{Bi}_{0.85}\text{La}_{0.15}\text{FeO}_3$ . Micrographs were taken after milling (a) 0.5 h, (b) 1.5 h, (c) 3 h, (d) EDX spectrum of the product shown in (c).

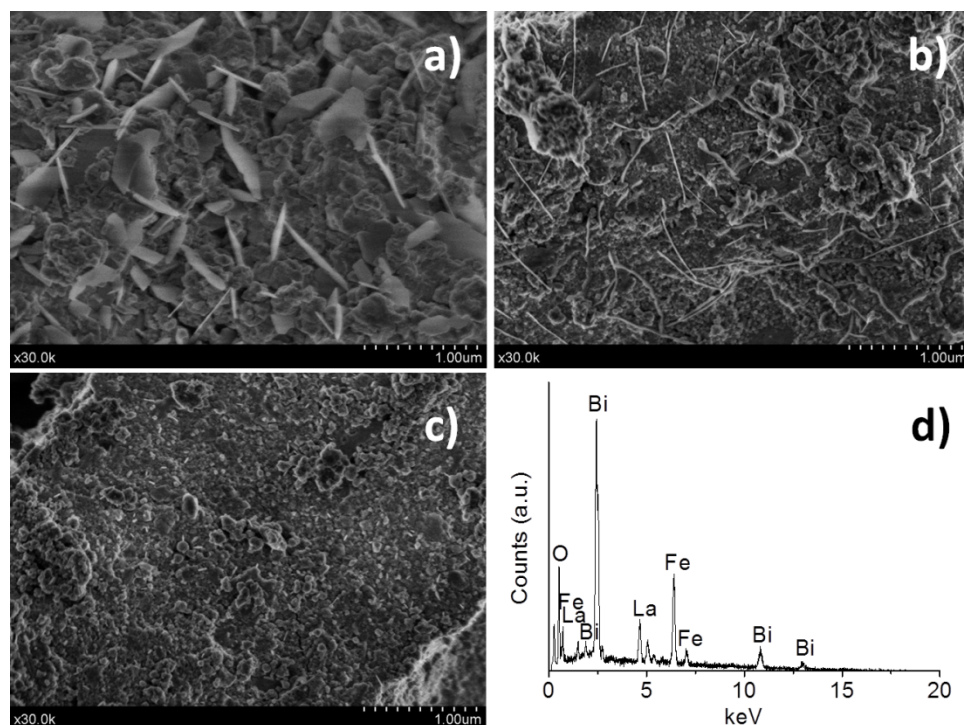

**Figure S10.** SEM micrographs corresponding to powders obtained after milling the single oxides necessary for the composition  $\text{Bi}_{0.70}\text{La}_{0.30}\text{FeO}_3$ . Micrographs were taken after milling: (a) 0.25 h, (b) 1 h, (c) 2 h, (d) EDX spectrum of the product shown in (c).

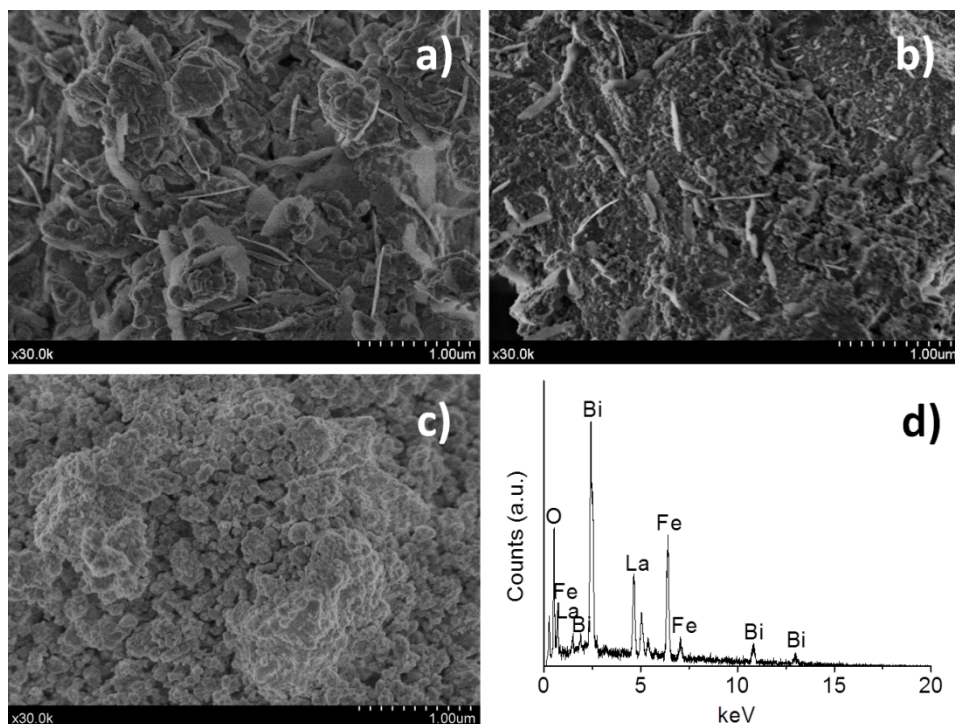

**Figure S11.** SEM micrographs corresponding to powders obtained after milling the single oxides necessary for the composition  $\text{Bi}_{0.55}\text{La}_{0.45}\text{FeO}_3$ . Micrographs were taken after milling: (a) 0.5 h, (b) 1 h, (c) 2 h, (d) EDX spectrum of the product shown in (c).

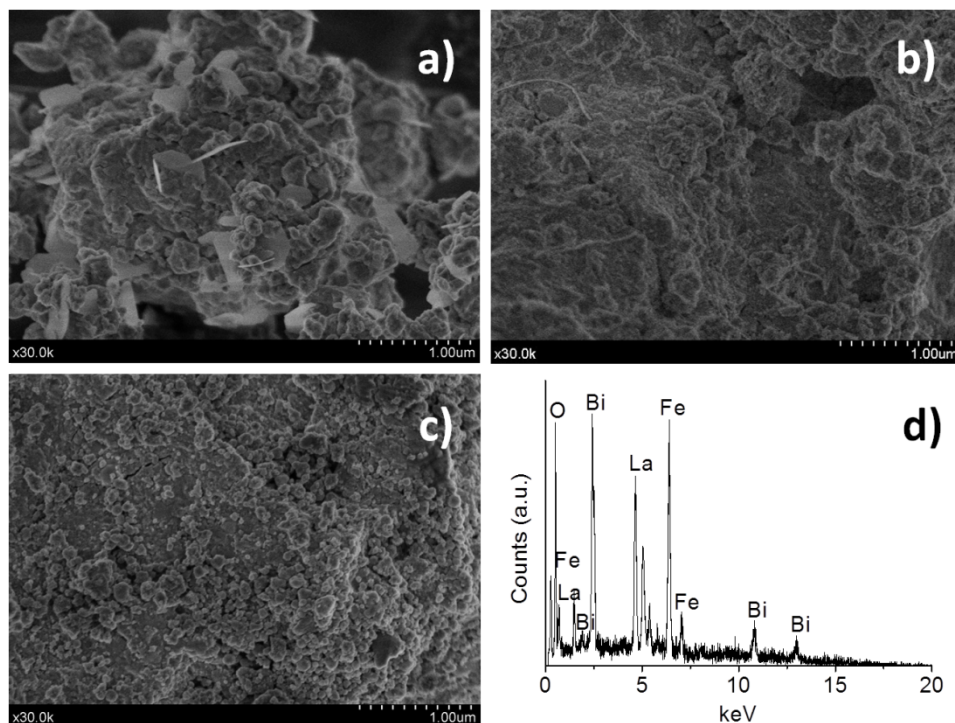

**Figure S12.** SEM micrographs corresponding to powders obtained after milling the single oxides necessary for the composition  $\text{Bi}_{0.40}\text{La}_{0.60}\text{FeO}_3$ . Micrographs were taken after milling: (a) 0.5 h, (b) 1 h, (c) 2 h, (d) EDX spectrum of the product shown in (c).



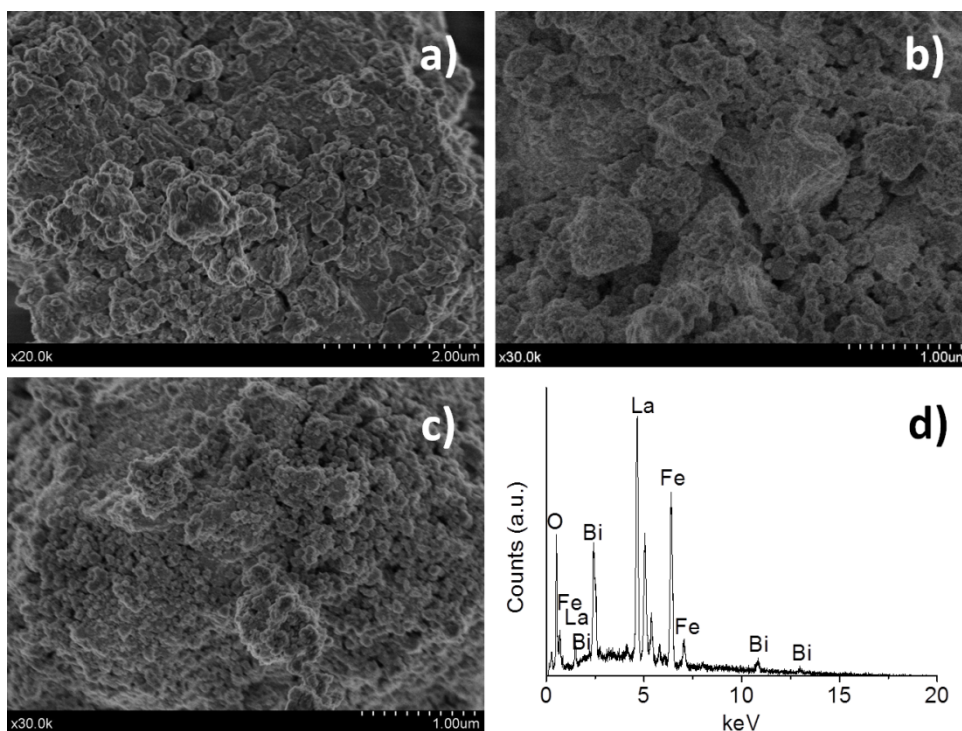

**Figure S13.** SEM micrographs corresponding to powders obtained after milling the single oxides necessary for the composition  $\text{Bi}_{0.20}\text{La}_{0.80}\text{FeO}_3$ . Micrographs were taken after milling: (a) 0.25 h, (b) 1 h, (c) 1.5 h, (d) EDX spectrum of the product shown in (c).

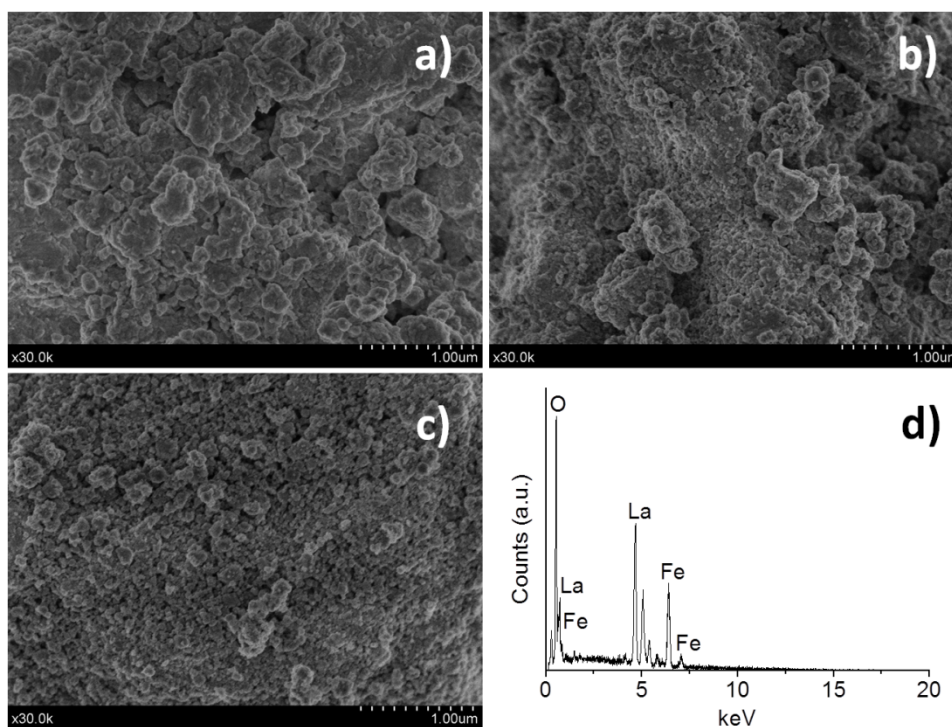

**Figure S14.** SEM micrographs corresponding to powders obtained after milling the single oxides necessary for the composition  $\text{LaFeO}_3$ . Micrographs were taken after milling: (a) 0.5 h, (b) 1 h, (c) 2 h, (d) EDX spectrum of the product shown in (c).



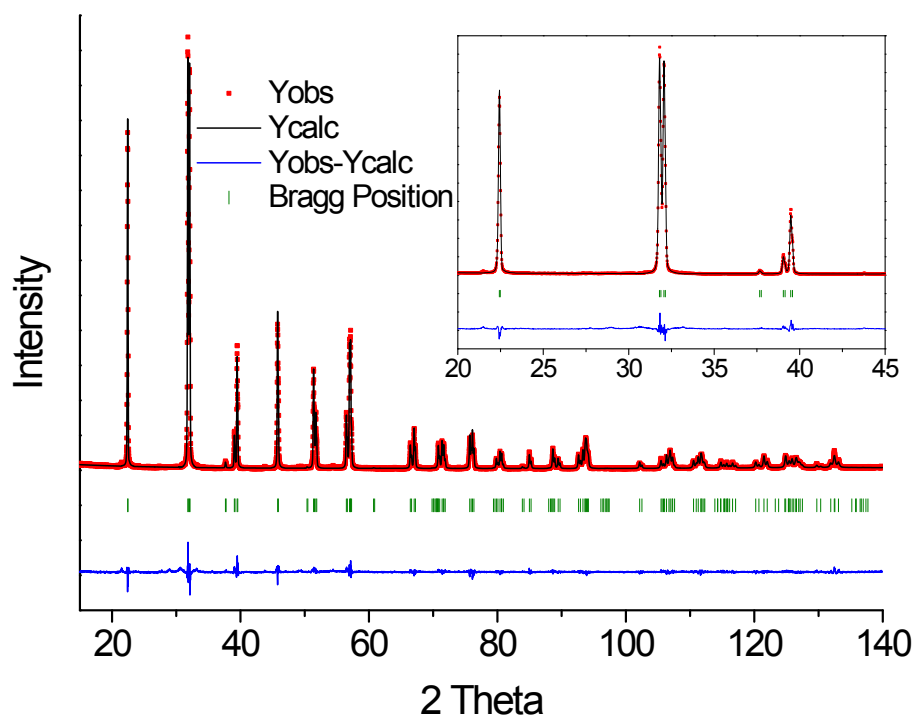

**Figure S15.** Diffraction pattern corresponding to the sample  $\text{Bi}_{0.93}\text{La}_{0.07}\text{FeO}_3$  obtained after milling the single oxides for 3 hours, and heated to  $800^\circ\text{C}$  (dots). The solid lines are the results of the Rietveld refinement. The inset shows a detail of the refinement in the range  $20\text{--}45^\circ$  where the maxima peaks are observed.

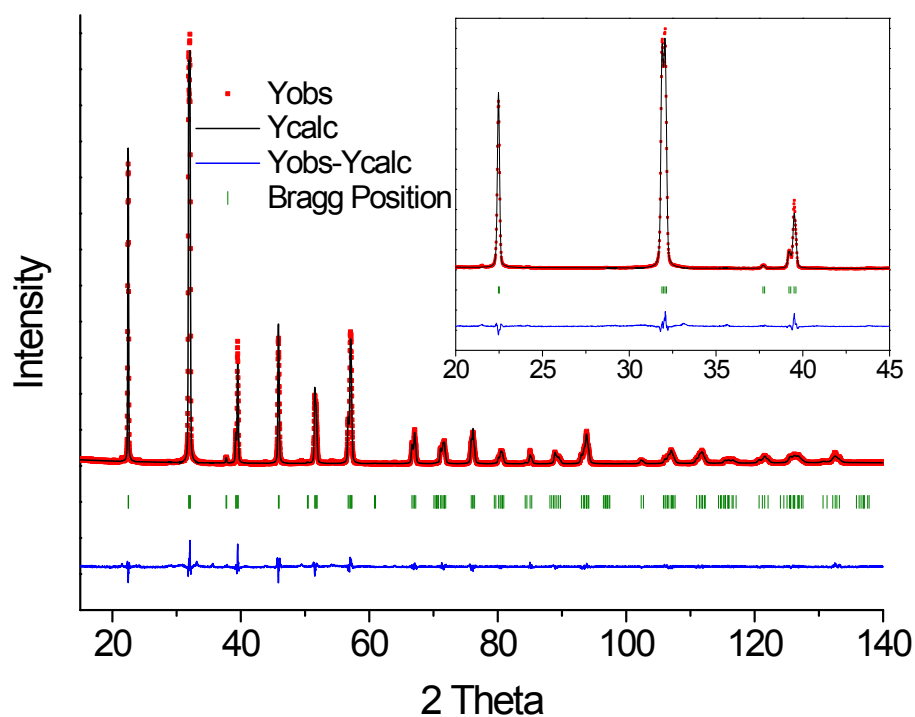

**Figure S16.** Diffraction pattern corresponding to the sample  $\text{Bi}_{0.85}\text{La}_{0.15}\text{FeO}_3$  obtained after milling the single oxides for 3 hours, and heated to  $800^\circ\text{C}$  (dots). The solid lines are the results of the Rietveld refinement. The inset shows a detail of the refinement in the range  $20\text{--}45^\circ$  where the maxima peaks are observed.

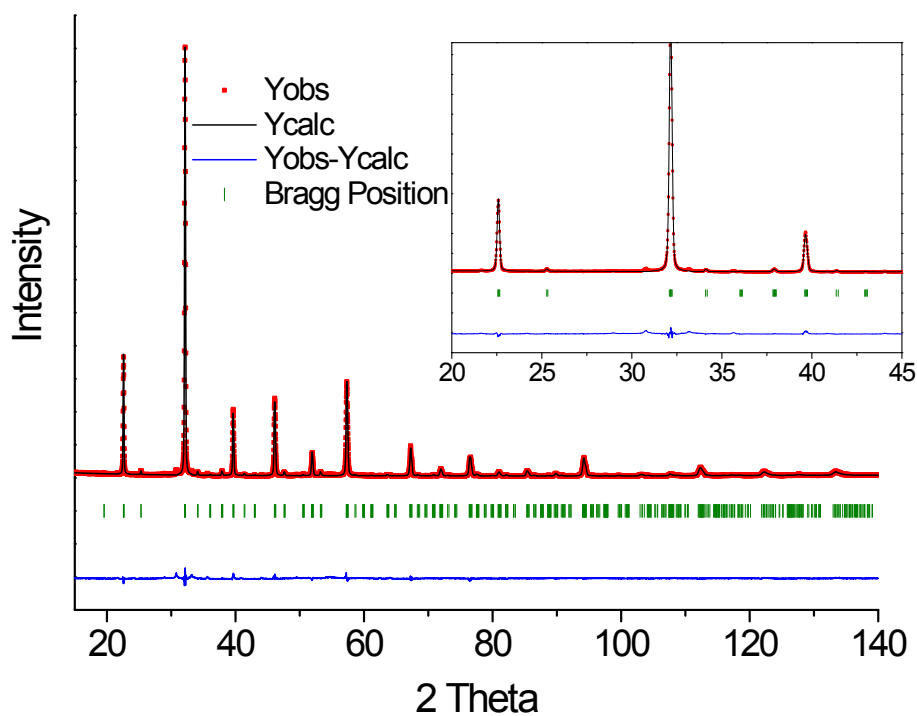

**Figure S17.** Diffraction pattern corresponding to the sample  $\text{Bi}_{0.55}\text{La}_{0.45}\text{FeO}_3$  obtained after milling the single oxides for 2 hours, and heated to  $800^\circ\text{C}$  (dots). The solid lines are the results of the Rietveld refinement. The inset shows a detail of the refinement in the range  $20-45^\circ$  where the maxima peaks are observed.

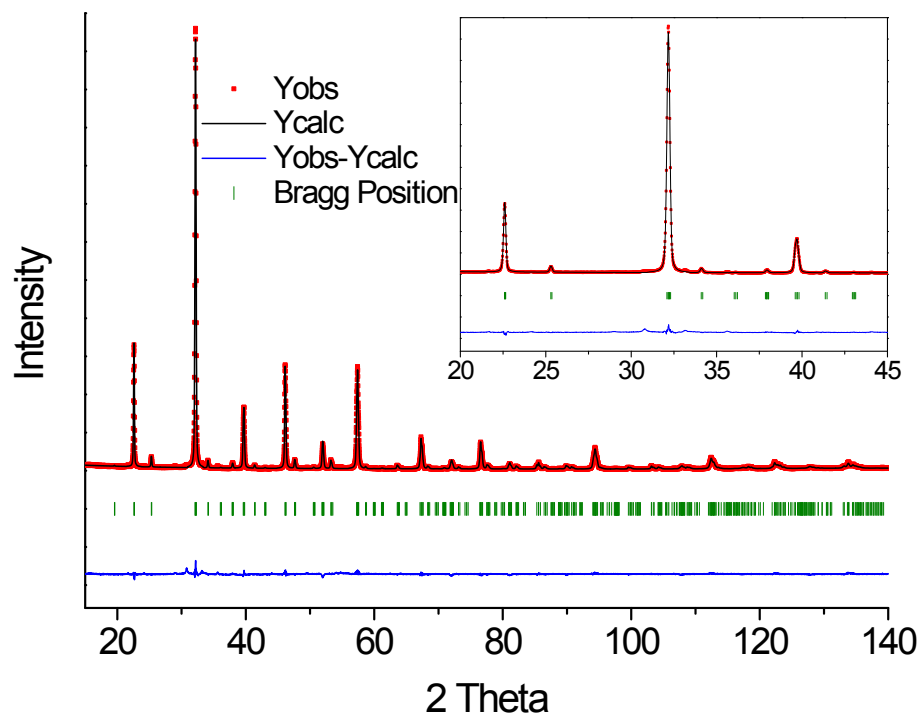

**Figure S18.** Diffraction pattern corresponding to the sample  $\text{Bi}_{0.40}\text{La}_{0.60}\text{FeO}_3$  obtained after milling the single oxides for 2 hours and heated to  $800^\circ\text{C}$  (dots). The solid lines are the results of the Rietveld refinement. The inset shows a detail of the refinement in the range  $20-45^\circ$  where the maxima peaks are observed.

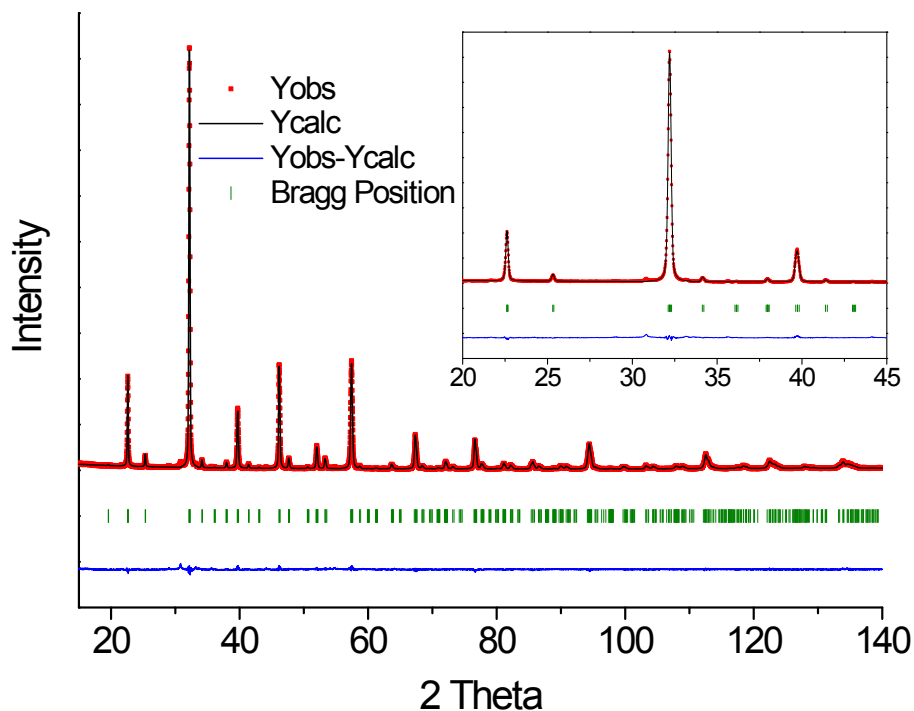

**Figure S19.** Diffraction pattern corresponding to the sample  $\text{Bi}_{0.20}\text{La}_{0.80}\text{FeO}_3$  obtained after milling the single oxides for 2 hours and heated to  $800^\circ\text{C}$  (dots). The solid lines are the results of the Rietveld refinement. The inset shows a detail of the refinement in the range  $20\text{--}45^\circ$  where the maxima peaks are observed.

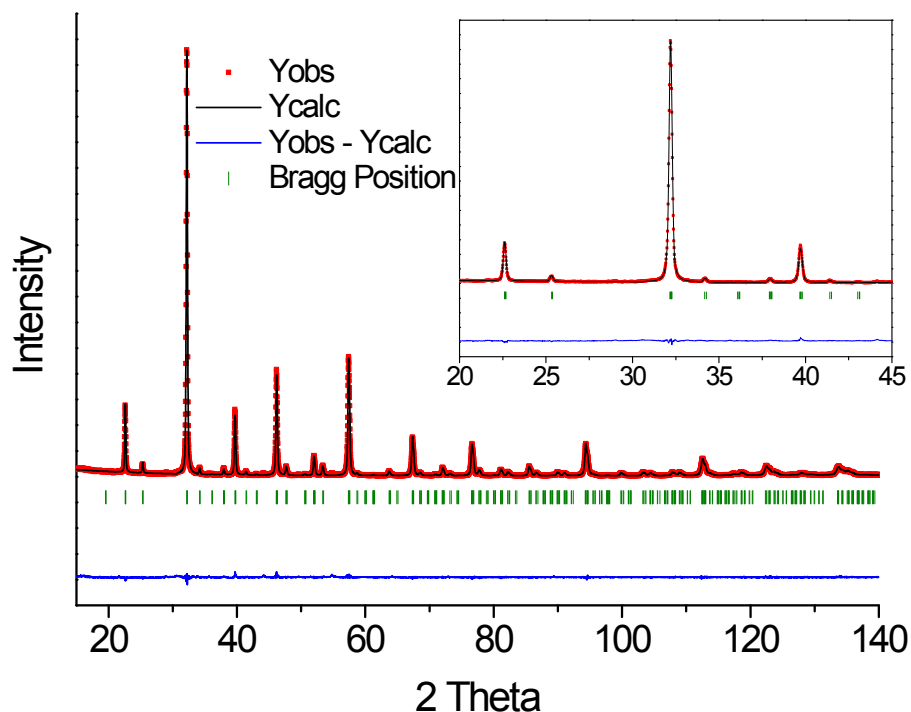

**Figure S20.** Diffraction pattern corresponding to the sample  $\text{LaFeO}_3$  obtained after milling the single oxides for 2 hours and heated to  $800^\circ\text{C}$  (dots). The solid lines are the results of the Rietveld refinement. The inset shows a detail of the refinement in the range  $20\text{--}45^\circ$  where the maxima peaks are observed.

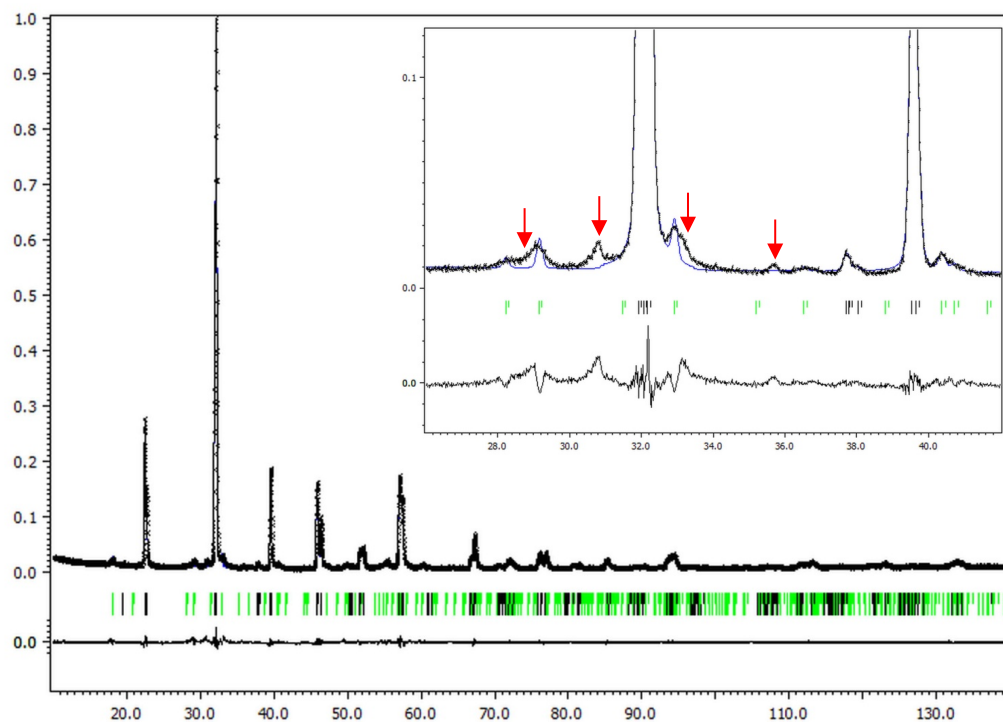

**Figure S21.** Diffraction pattern corresponding to the sample  $\text{Bi}_{0.70}\text{La}_{0.30}\text{FeO}_3$  obtained after milling the single oxides for 2 hours and heated to  $800^\circ\text{C}$  (dots). The refinement of the pattern with Jana2006 in LeBail pattern match mode was performed considering the superspace group  $\text{Imma}(00\gamma)s00$ . The inset shows a detail of the refinement in the range  $26\text{--}42^\circ$ . The red arrows indicate the satellite peaks not fitted by this super structure.

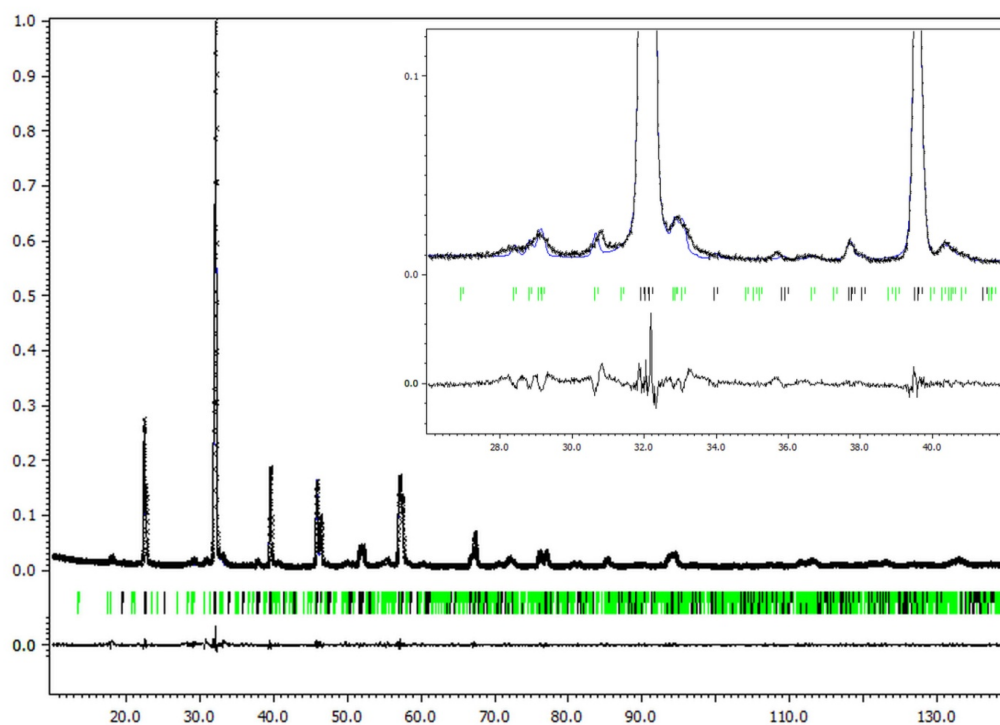

**Figure S22.** Rietveld refinement of the pattern of the sample  $\text{Bi}_{0.70}\text{La}_{0.30}\text{FeO}_3$  with Jana2006 in LeBail pattern match mode considering the superspace group  $\text{Pn}2_1\text{a}(00\gamma)\text{s}00$ . The inset shows a detail of the refinement in the range  $26\text{--}42^\circ$ . All satellite peaks are fitted by this super structure.

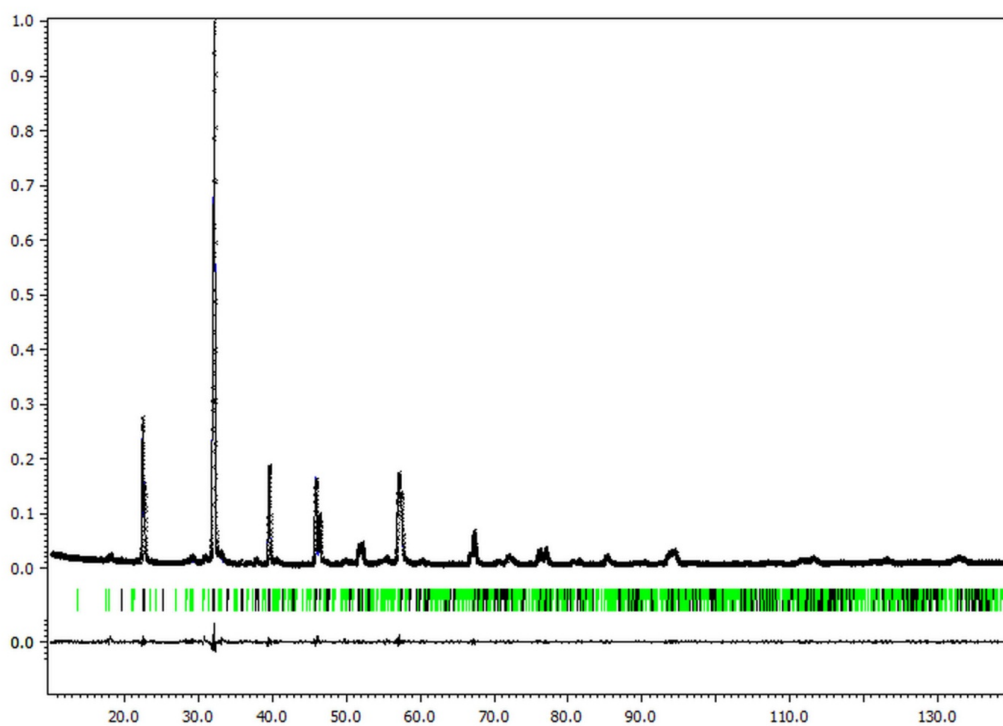

**Figure S23.** Full Rietveld refinement of the pattern of the sample  $\text{Bi}_{0.70}\text{La}_{0.30}\text{FeO}_3$  with Jana2006 considering the superspace group  $\text{Pn}2_1\text{a}(00\gamma)\text{s}00$ .



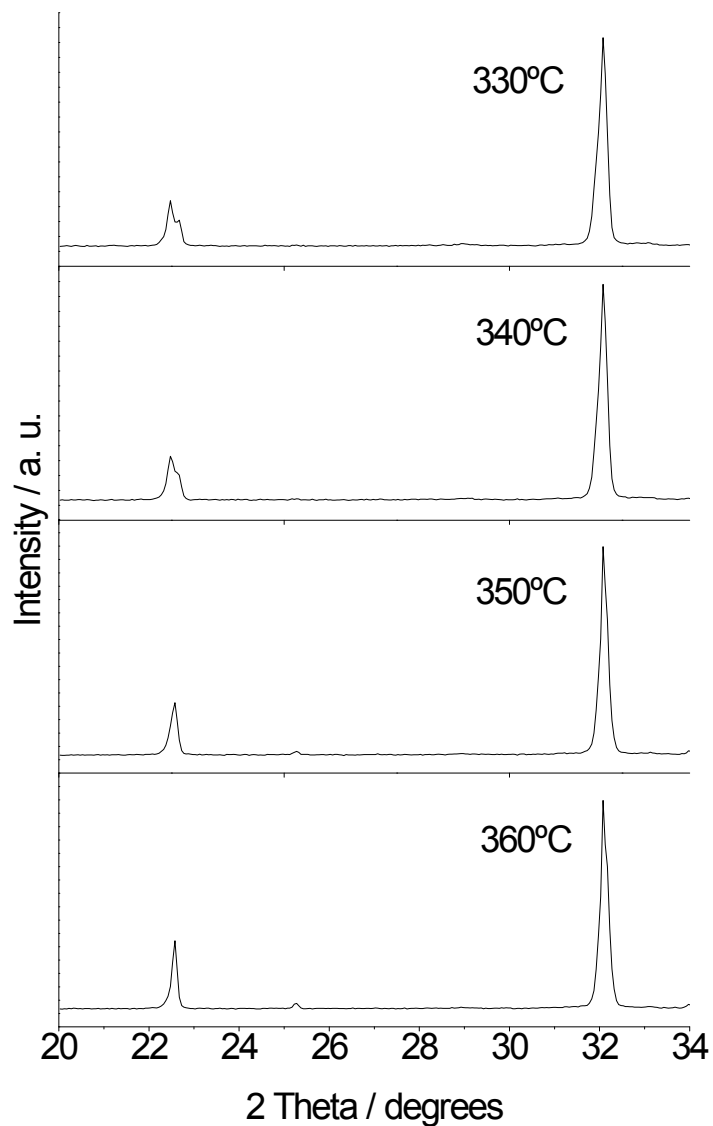

**Figure S24.** Detail of the XRD patterns measured at different temperatures (between 320°C and 360°C) for  $\text{Bi}_{0.70}\text{La}_{0.30}\text{FeO}_3$ . From 350°C the double peak at about 22.5° transforms to a single peak and a new peak at 25.3° appears. The new phase can be indexed as Pnma, as was observed for compositions  $x \leq 0.15$  above  $T_C$ . Other phase transitions at higher temperatures were not observed.

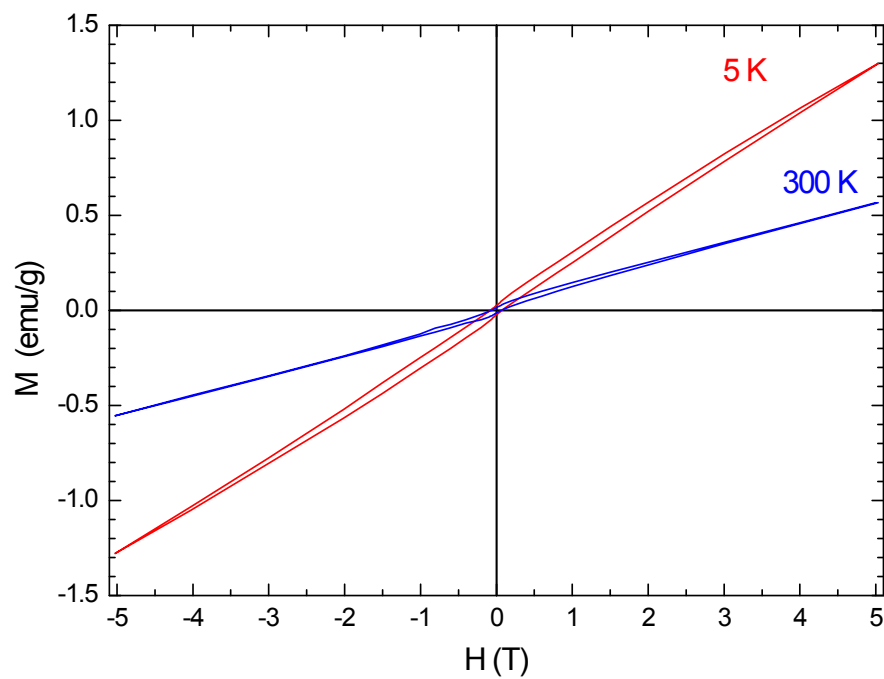

**Figure S25.** Magnetic field dependence of the magnetization at 5 K and 300 K for BiFeO<sub>3</sub> nanoparticles.

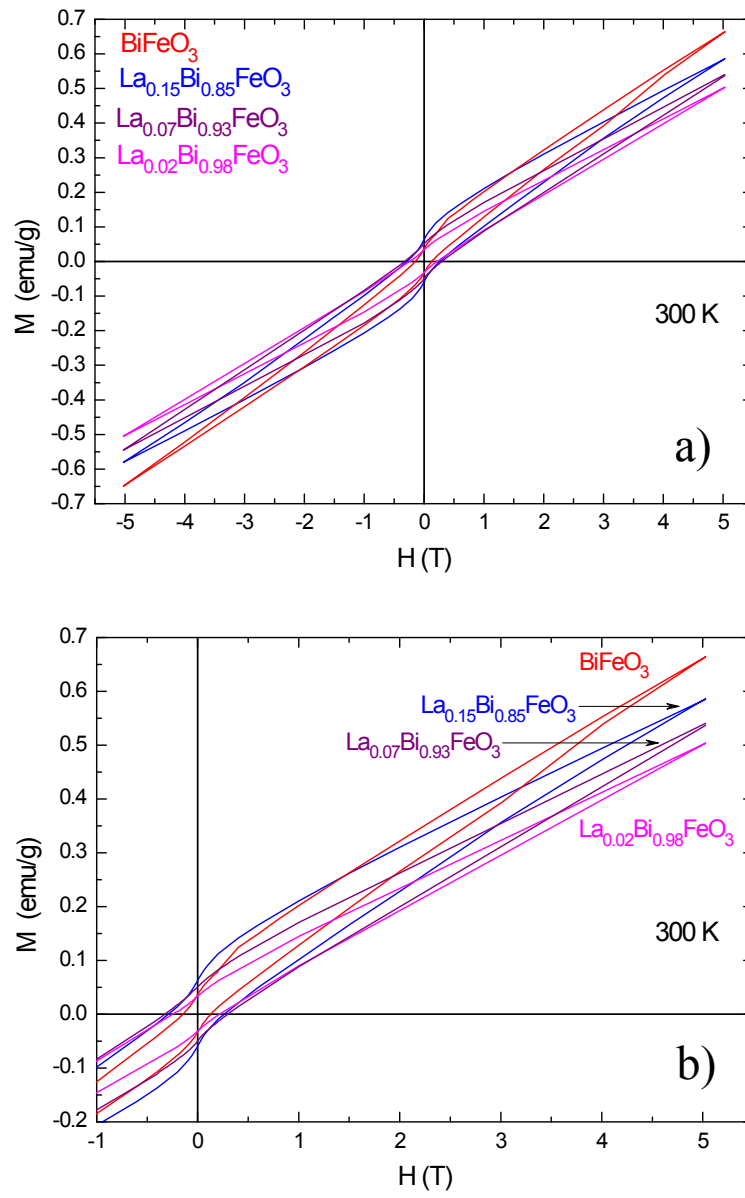

**Figure S26.** (a) Hysteresis loops obtained at 300 K for  $\text{Bi}_{1-x}\text{La}_x\text{FeO}_3$  samples with  $x=0, 0.02, 0.07$  and  $0.15$ . (b) Zoom of the hysteresis loops.
